# Supplementary material for: 3D Printing of Dapagliflozin Containing Self-Nanoemulsifying Tablets: Formulation Design and In Vitro Characterization
Source: MDPI journal article supplement (doi:10.3390/pharmaceutics13070993), 2021-06-30
Supplement: s1 [file s1]

# Supplementary Materials: 3D Printing of Dapagliflozin Containing Self-nanoemulsifying Tablets: Formulation Design and In Vitro Characterization

Mohammed S. Algahtani, Abdul Aleem Mohammed, Javed Ahmad, M. M. Abdullah and Ehab Saleh

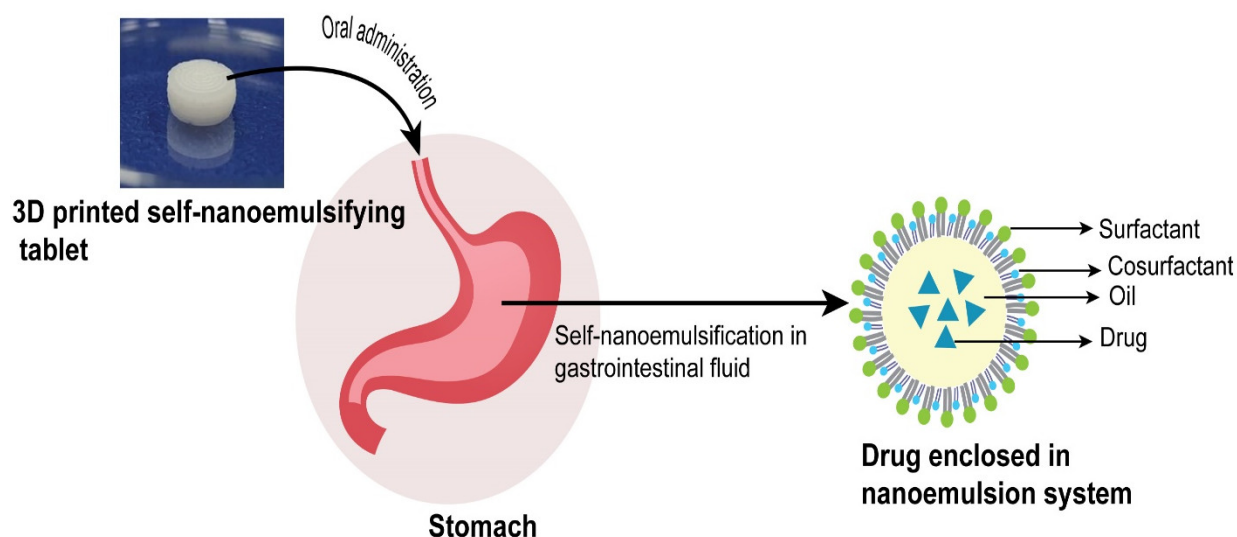

**Figure S1.** Schematic illustration presenting generation of drug enclosed nanoemulsion system upon self-nanoemulsification of 3D printed self-nanoemulsifying tablet in gastrointestinal fluid.

**Table S1.** Optimization of extrudability behavior based on printed layer/line dimension (thickness and height).

| Nozzle diameter | 0.840 mm            |                  |
|-----------------|---------------------|------------------|
| Printed lines   | Line thickness (mm) | Line height (mm) |
| Line 1          | 1.108               | 0.679            |
| Line 2          | 0.964               | 0.669            |
| Line 3          | 0.898               | 0.749            |
| Line 4          | 1.156               | 0.795            |
| Average ± SD    | 1.0315 ± 0.12       | 0.723 ± 0.05     |
